# Supplementary material
Source: PubMed Central journal article supplement (PMC3397263)
Supplement: mmc1.pdf [file mmc1.pdf]

## Supplemental Data

### Metabolic Correction of Congenital Erythropoietic

### Porphyria with iPSCs Free of Reprogramming Factors

Aurélié Bedel, Miguel Taillepiere, Véronique Guyonnet-Duperat, Eric Lippert, Pierre Dubus, Sandrine Dabernat, Thibaud Mautuit, Bruno Cardinaud, Catherine Pain, Benoît Rousseau, Magalie Lalanne, Cécile Ged, Yann Duchartre, Emmanuel Richard, Hubert de Verneuil, and François Moreau-Gaudry

Table S1. Oligonucleotides Used in This Study

| Oligonucleotide | Application               | Sequence (5' to 3')                 |
|-----------------|---------------------------|-------------------------------------|
| OSK F#1         | OSK1 provirus detection   | CCAGCTTGGCACTTGATGTA                |
| OSK R#1         | OSK1 provirus detection   | CCATCACCTCCACCACCT                  |
| OSK F#2         | OSK1 provirus detection   | CCTGTCTCCGTCACCACTCT                |
| OSK R#2         | OSK1 provirus detection   | TTCAGCTCCGTCTCCATCAT                |
| OSK F#3         | OSK1 provirus detection   | CATGTCCCAGCACTACCAGA                |
| OSK R#3         | OSK1 provirus detection   | GGTCTCTCTCCGAGGTAGGG                |
| OSK F#4         | OSK1 provirus detection   | GATGAACTGACCAGGCACTA                |
| OSK R#4         | OSK1 provirus detection   | CTCGAGGGAATTCCGATAA                 |
| Mshp53 F#5      | Mshp53 provirus detection | TTCCGATCACGAGACTAG                  |
| Mshp53 R#5      | Mshp53 provirus detection | GAGCAGAGCCCGGAGCGG                  |
| Mshp53 F#6      | Mshp53 provirus detection | TGCTCCATGAGGAGACACC                 |
| Mshp53 R#6      | Mshp53 provirus detection | TCAACTGTTCTCGTCGTTTCC               |
| Mshp53 F#7      | Mshp53 provirus detection | TCAAGAGGCGAACACACAAC                |
| Mshp53 R#7      | Mshp53 provirus detection | TGGTGATTTCCAGAACACA                 |
| UROS F          | qPCR UROS                 | GGAAGCAGCAGAGTTATGTTTGGGA           |
| UROS R          | qPCR UROS                 | ACATACACTGACTTGGCATTCCATT           |
| RNaseP probe    | qPCR UROS                 | ACCTTTCCCAGACTTCA                   |
| LC1 linker      | LAM-PCR                   | GACCCGGGAGATCTGAATTGAGTGGCACAGTTAGG |
| LC3 linker      | LAM-PCR                   | AATTCCTAACTGCTGTGCCACTGAATTCAGATC   |
| LTRI*           | LAM-PCR                   | [Bln]GAGCTCTCTGGCTAACTAGG           |
| LCI             | LAM-PCR                   | GACCCGGGAGATCTGAATTC                |
| LTRII*          | LAM-PCR                   | [Bln]AGCTTGCCTTGAGTGCTTCA           |
| LCII            | LAM-PCR                   | AGTGGCACAGCAGTTAGG                  |
| LTRIII          | LAM-PCR                   | AGTAGTGTGTGCCCGTCTGT                |
| chs4 F          | LAM-PCR                   | GCTTCTCGCTGCTCTTTGA                 |
| 4-c R           | LAM-PCR                   | CAATGCAAGGAACTAGATGGTC              |
| 4-i R           | LAM-PCR                   | TCACTCTCTGATATTCATTTCTTTGC          |
